# Supplementary material for: Rheological behavior of Pluronic/Pluronic diacrylate hydrogels used for bacteria encapsulation in engineered living materials
Source: Royal Society of Chemistry journal article supplement (doi:10.1039/d3sm01119d), 2023-12-18
Supplement: d3sm01119d1.pdf [file d3sm01119d1.pdf]

## SUPPLEMENTARY INFORMATION

### **Rheological behavior of Pluronic/Pluronic diacrylate hydrogels used for bacteria encapsulation**

Shardul Bhusari<sup>1,2</sup>, Maxi Hoffmann<sup>3</sup>, Petra Herbeck-Engel<sup>1</sup>, Shrikrishnan Sankaran<sup>1</sup>, Manfred Wilhelm<sup>3</sup>, Aránzazu del Campo<sup>1,2\*</sup>

<sup>1</sup> INM-Leibniz Institute for New Materials, Campus D2 2, 68123 Saarbrücken, Germany

<sup>2</sup> Chemistry Department, Saarland University, Saarbrücken, Germany

<sup>3</sup> Karlsruhe Institute of Technology (KIT), Institute for Chemical Technology and Polymer Chemistry (ITCP), Engesserstraße 18, 76131 Karlsruhe, Germany

\*Corresponding author: [aranzazu.delcampo@leibniz-inm.de](mailto:aranzazu.delcampo@leibniz-inm.de)

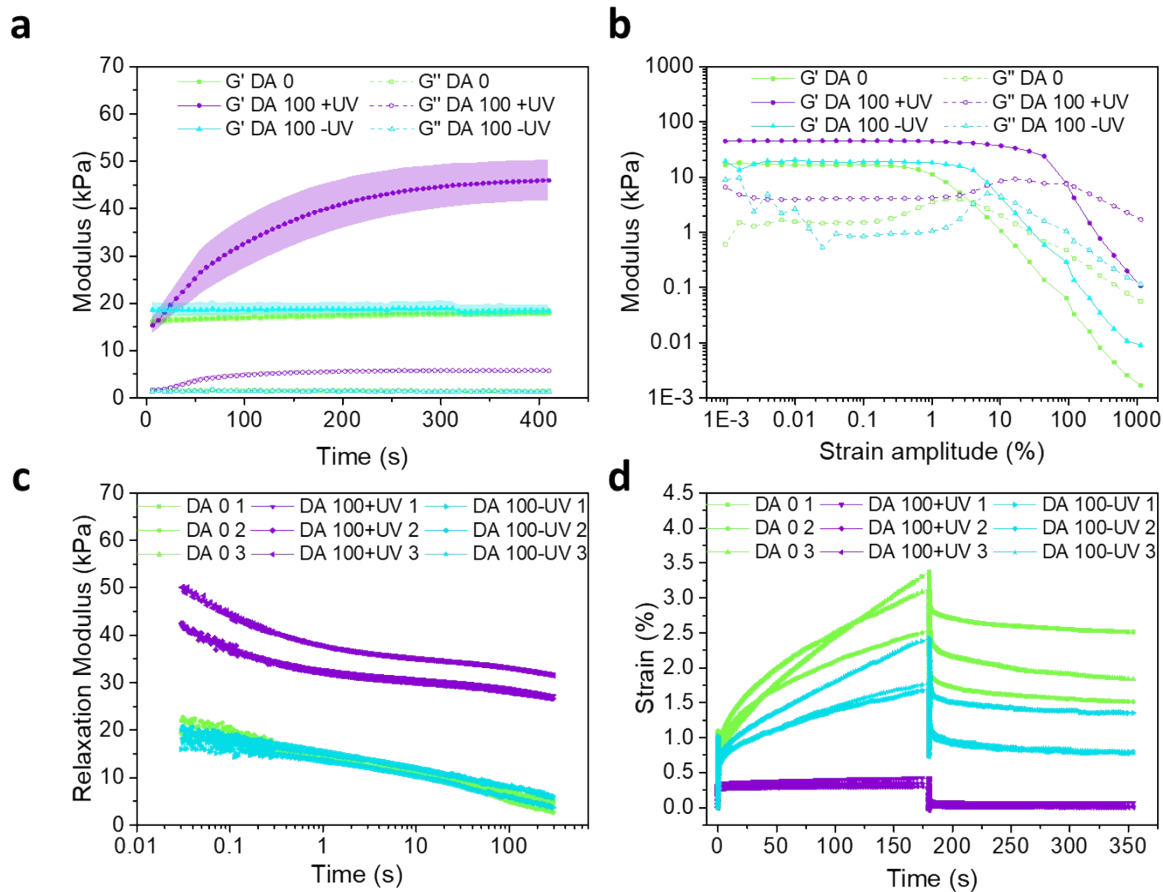

**Figure S1:** Rheological properties of DA 0 and DA 100 hydrogels before and after UV exposure and polymerization **a)** Time evolution of the  $G'$  and  $G''$  (shaded regions around the data points indicate mean  $\pm$  standard deviation) at room temperature; **b)** Representative strain amplitude sweep of DA X hydrogels measured at a frequency of 1 Hz; **c)** Creep/recovery curves at an applied stress of 100 Pa (Stress was applied for 180 s and then removed to measure the recovery over the next 180 s), and **d)** Stress relaxation curves at 1% strain. In **c)** and **d)** data from 3 independent experiments are shown to visualize the reproducibility of the measurements.

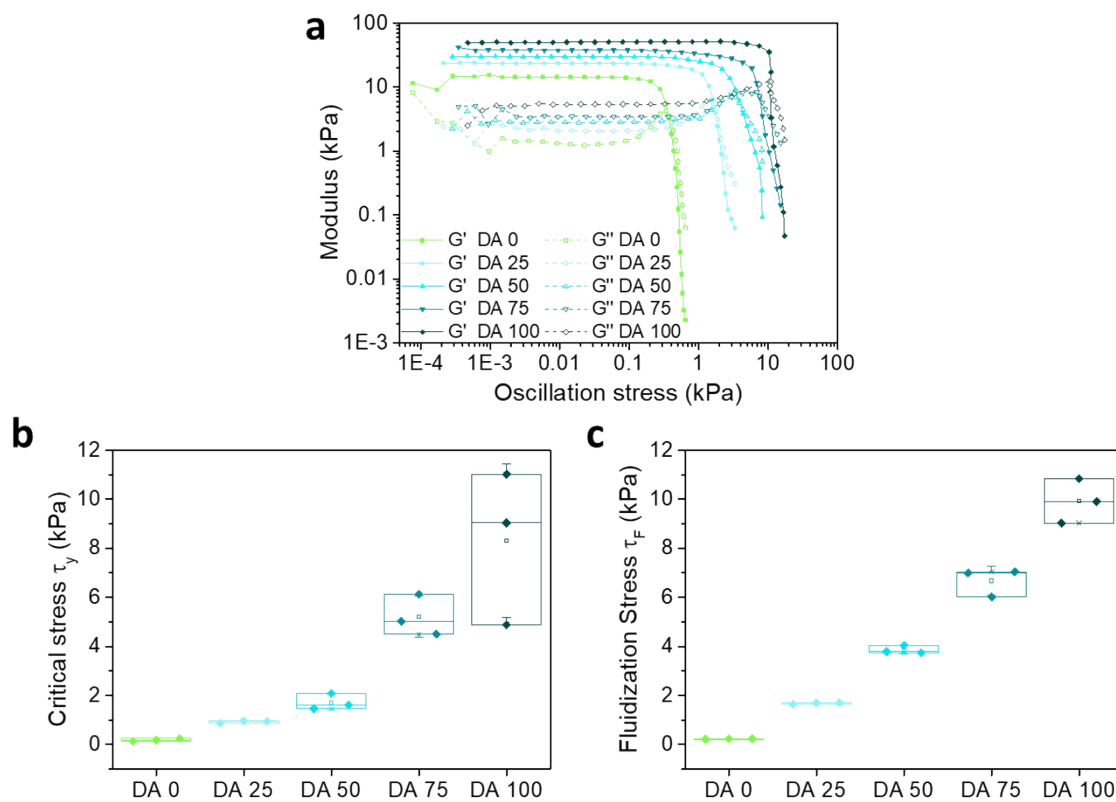

**Figure S2. a)** Representative stress sweeps and the corresponding **b)** yield stress,  $\tau_y$ , and **c)** stress at fluidization point,  $\tau_F$  with increasing DA content in the hydrogels.

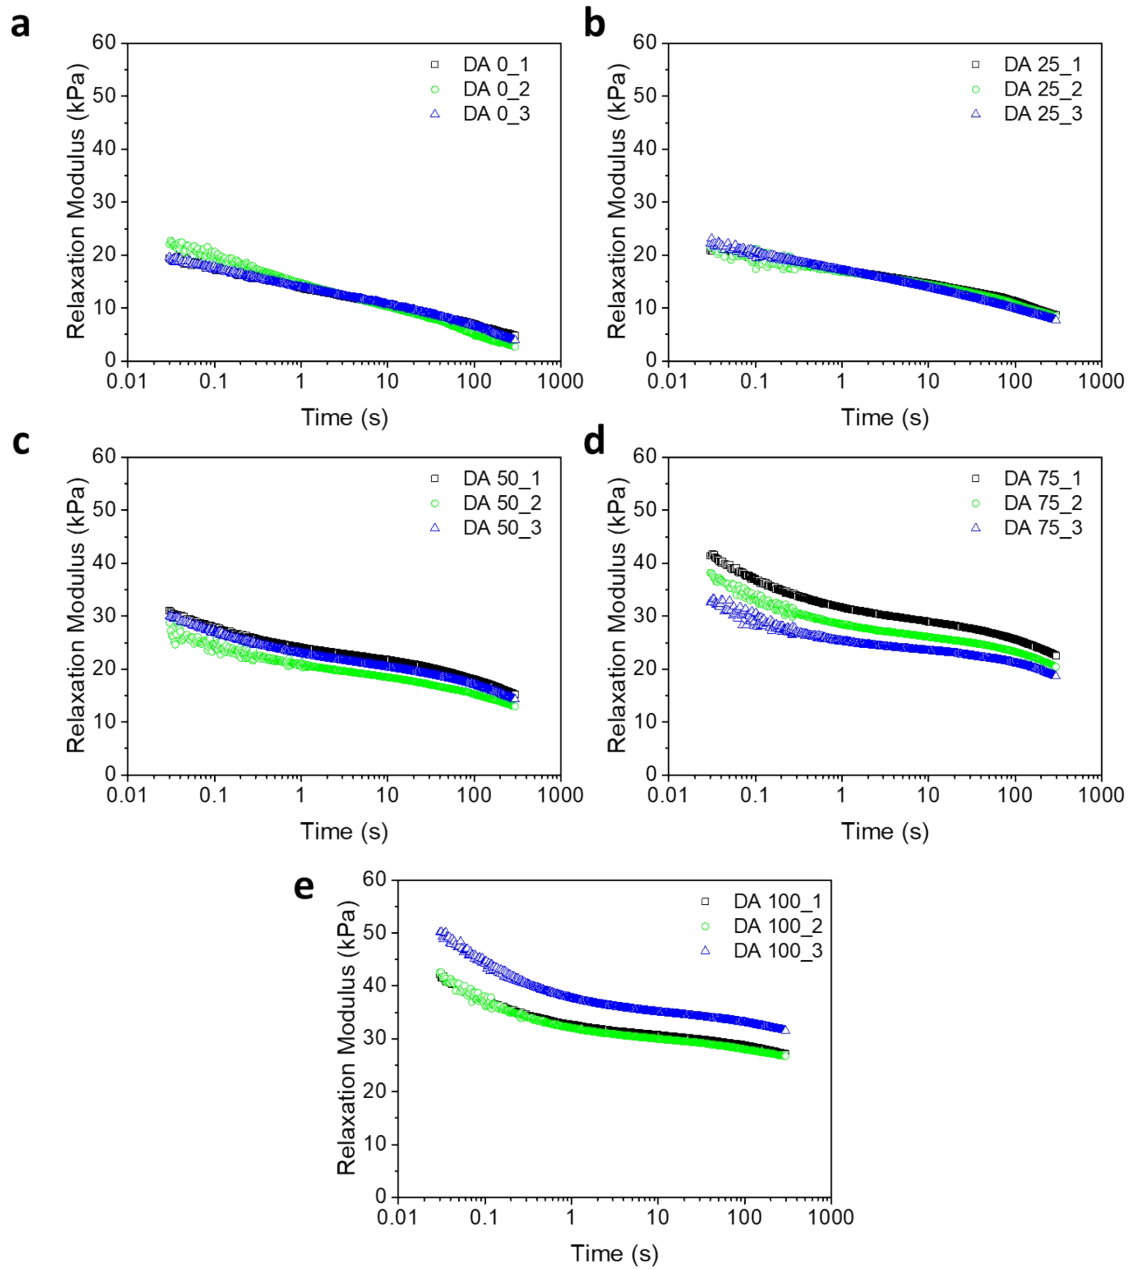

**Figure S3:** Stress relaxation curves of the DA 0-100 hydrogels at strain of 1% from three consecutive experiments used for the fitting in **Figure 3**.

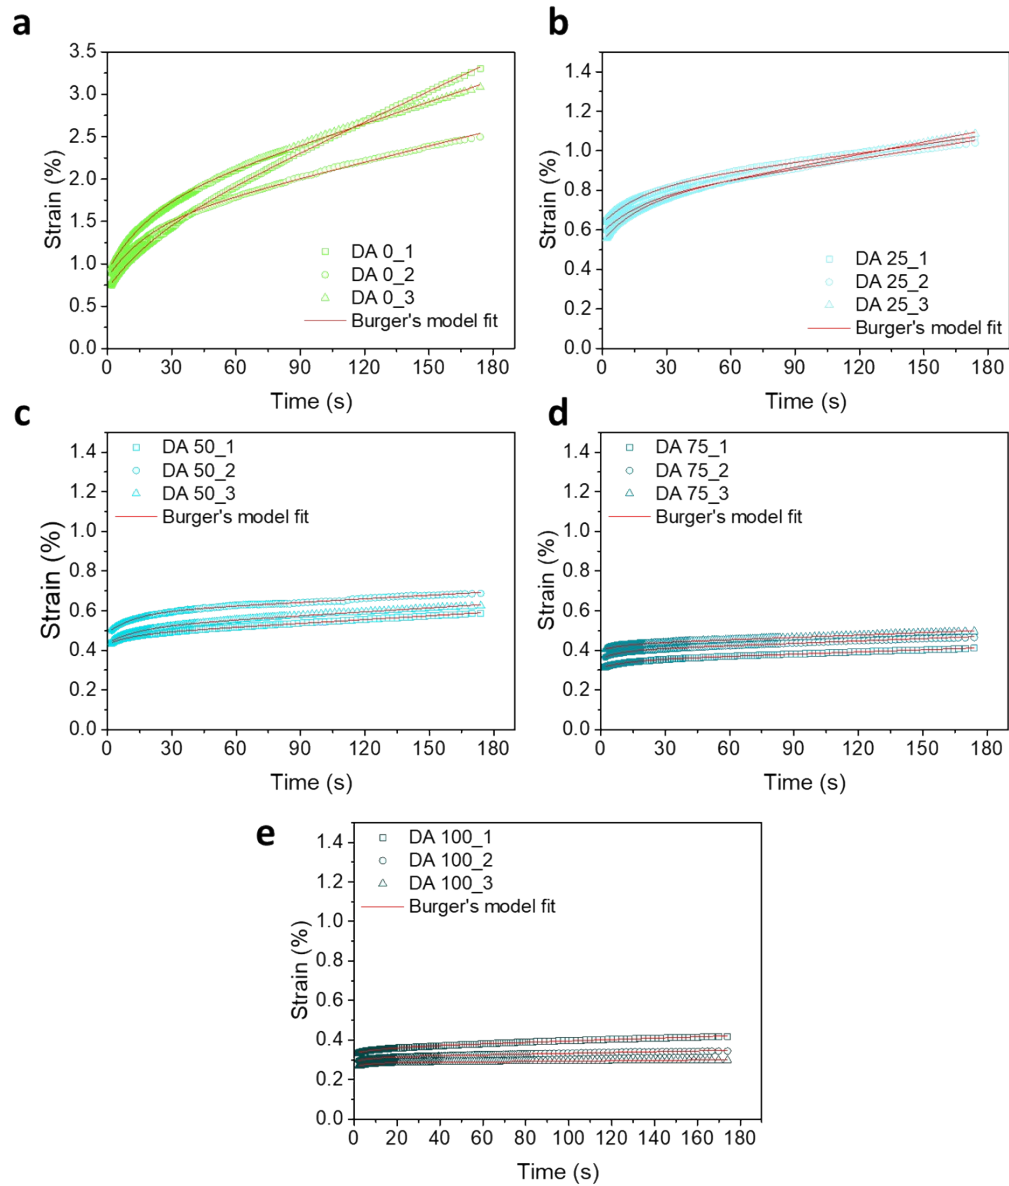

**Figure S4:** Creep strain and corresponding burgers model (Eq. 2) fits for the DA0-100 hydrogels.

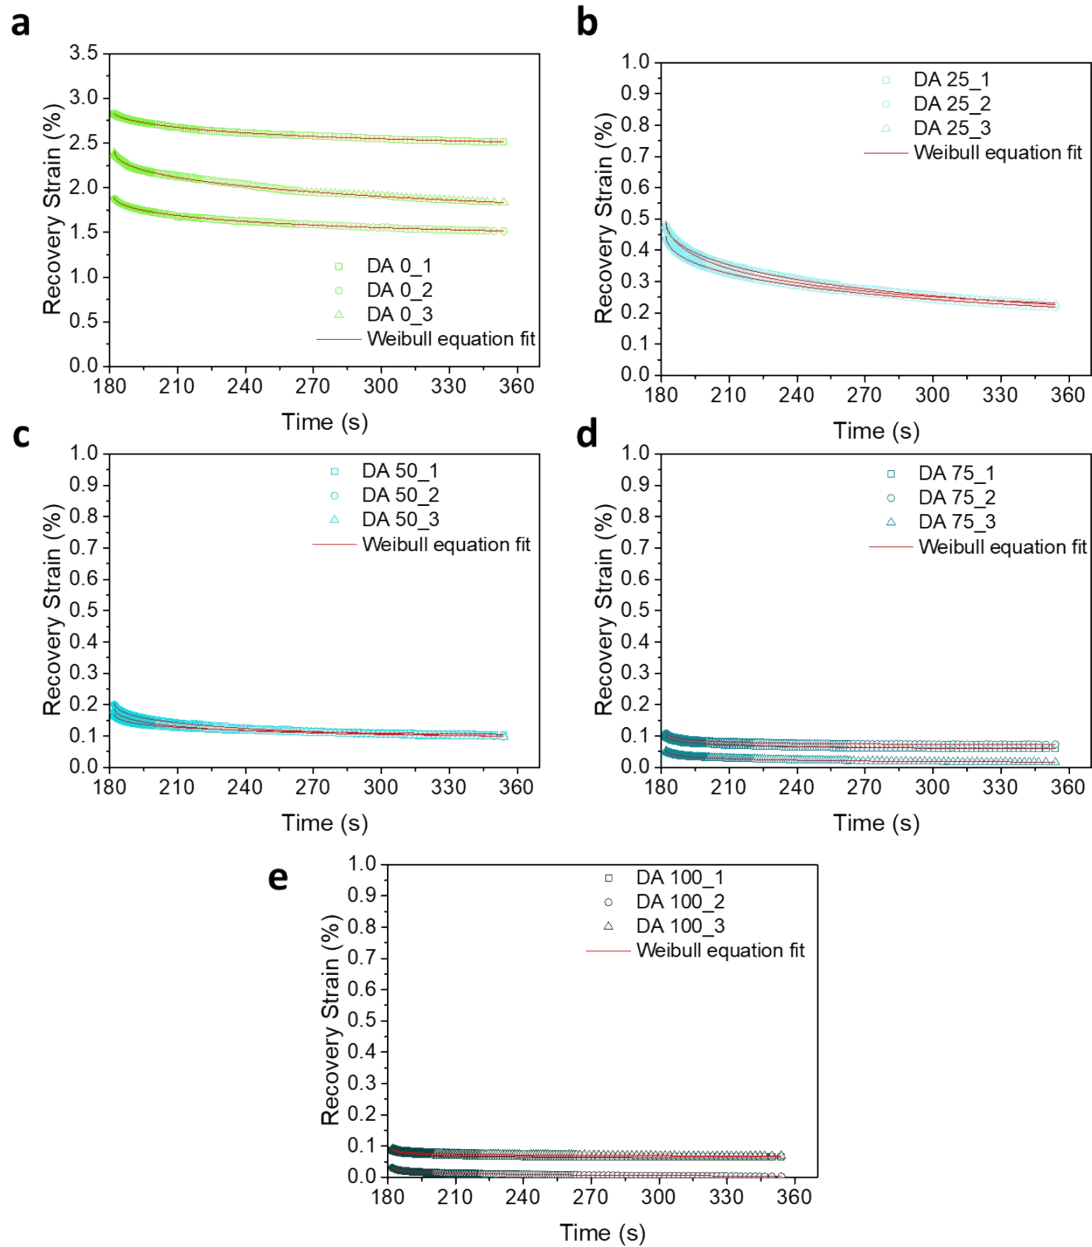

**Figure S5:** Recovery strain and corresponding fits to the Weibull equation (Eq. 3) for DA0-100 hydrogels.
